SPRING 2018 | VOLUME 16 | NUMBER 2

# Focus

The Journal of Lifelong Learning in Psychiatry

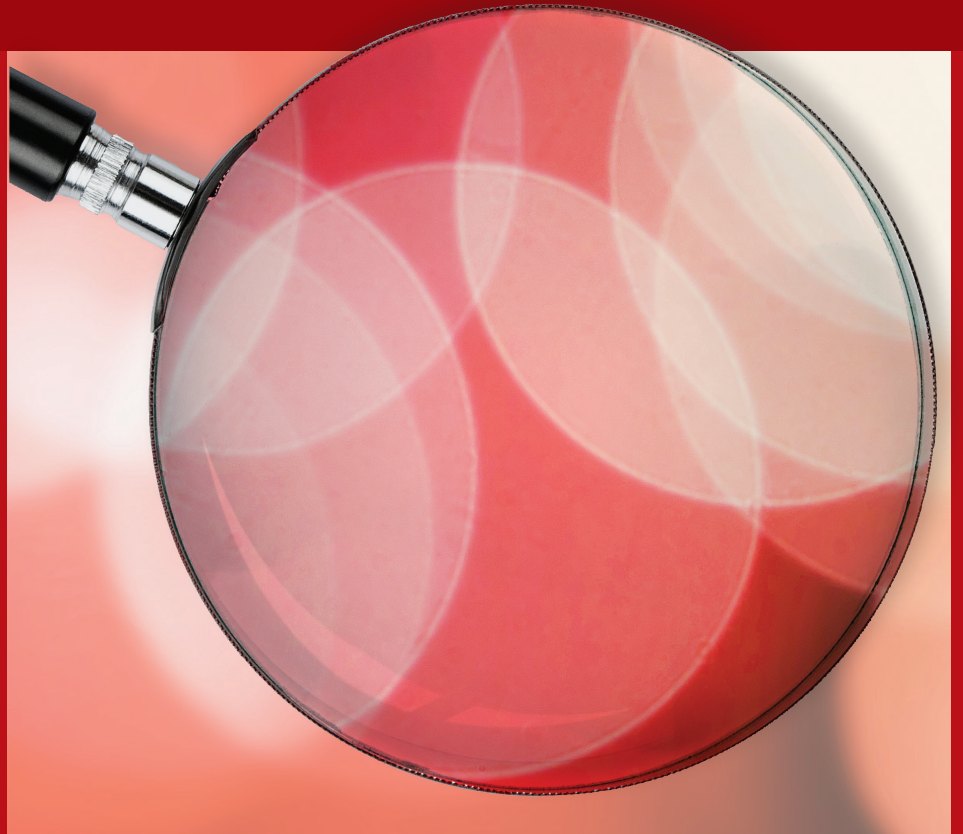

## Biomarkers in Psychiatry

Guest Editor: A. John Rush, M.D.

AMERICAN  
PSYCHIATRIC  
ASSOCIATION

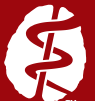

[focus.psychiatryonline.org](http://focus.psychiatryonline.org)
