# Subscribe today to the highest ranked mental health journal in the Health Policy & Services category!\*

## Don't miss the March issue:

- Person-oriented recovery for people with serious mental illness
- Randomized trial of interventions for smoking cessation
- Treatment utilization for PTSD in a national population
- Urine testing for adherence to antipsychotics

## Coming in the April issue:

- Incorporating peer-to-peer interactions in digital interventions for psychotic disorders
- Trends in youths' antidepressant use since 2004 FDA warning
- Federal parity and access to behavioral health care in commercial health plans
- PC-MHI in the VA: shifting mental health services to primary care

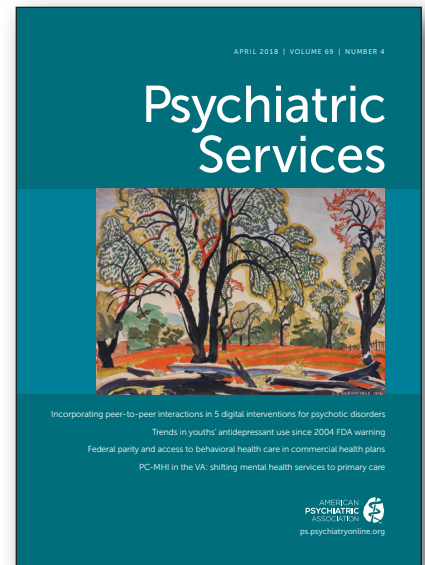

## One low price covers your print and online subscription.

\$ 121 APA Member print and online subscription

\$ 110 APA Member online-only subscription

PSYCHIATRIC  
SERVICES

FROM PAGES  
TO PRACTICE

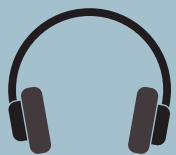

Listen to our podcast,  
*Psychiatric Services From Pages to Practice!*

[ps.psychiatryonline.org](http://ps.psychiatryonline.org)

Subscribe today at [www.appi.org](http://www.appi.org) or call  
Customer Service at 1-800-368-5777.

\*By its most recent Impact Factor (2.888), *Psychiatric Services* is the highest ranked mental health services journal in the Health Policy & Services Category of ISI's Journal Citation Reports. Of the 77 peer-reviewed journals included in the Health Policy & Services Category, *Psychiatric Services* ranks 8th.

Priority Code AH1801April

AMERICAN  
PSYCHIATRIC  
ASSOCIATION  
PUBLISHING

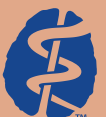

[www.appi.org](http://www.appi.org)
